# Supplementary material for: Ants Use Partner Specific Odors to Learn to Recognize a Mutualistic Partner
Source: PLOS journal article supplement (doi:10.1371/journal.pone.0086054), 2014-01-29

**Supporting information:**

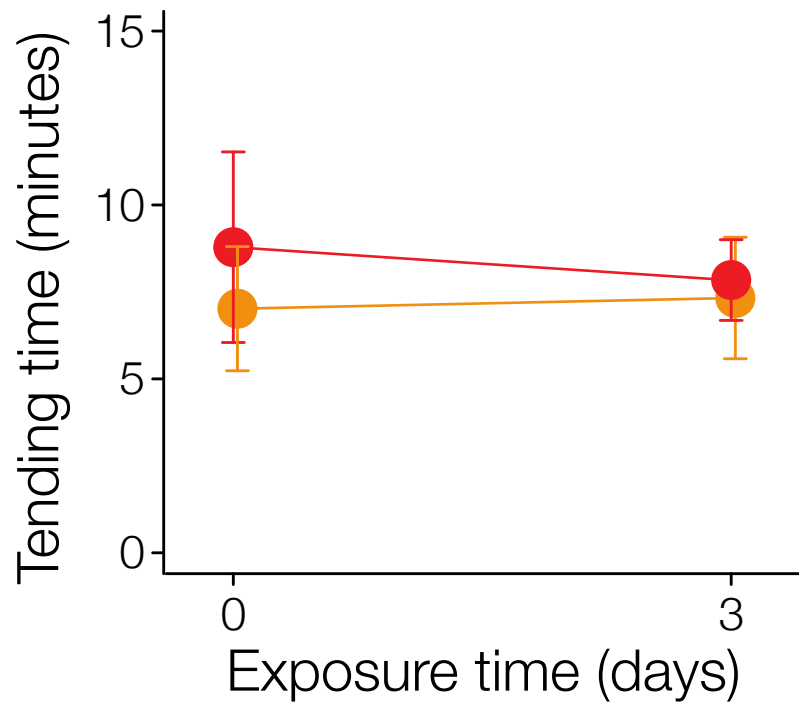

Supplement: S1 (10.1371/journal.pone.0086054.s001) [file journal.pone.0086054.s001]
